# Supplementary material
Source: Springer Nature journal article supplement (https://www.springermedizin.de/resource/supplementary/12916_2012_751_MOESM3_ESM.pdf/9598250)

Pubertal  
age

Contextual risk  
Nutritional cues

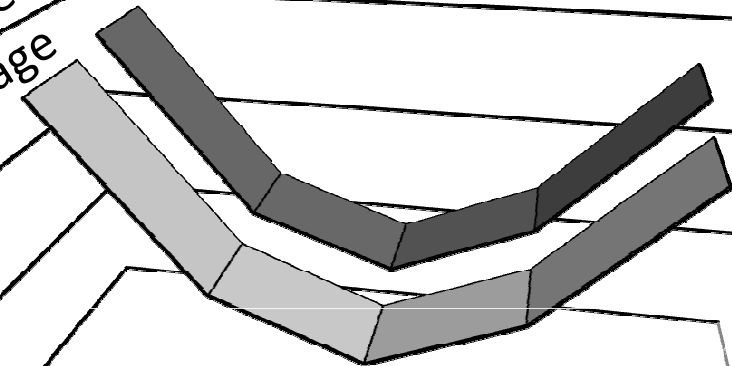

Supplement: MOESM3 [file 9598250]
